# Supplementary material for: Facile green synthesis of wasted hop-based zinc oxide nanozymes as peroxidase-like catalysts for colorimetric analysis
Source: Royal Society of Chemistry journal article supplement (doi:10.1039/d3nr04336c), 2023-11-30
Supplement: d3nr04336c1.pdf [file d3nr04336c1.pdf]

# Facile Green Synthesis of Wasted Hops-Based Zinc Oxide Nanozymes as Peroxidase-Like Catalysts for Colorimetric Analysis

Pei Liu,<sup>a,b</sup> Mengdi Liang,<sup>a,b</sup> Zhegwei Liu,<sup>a,b</sup> Haiyu Long,<sup>a,b</sup> Han Cheng,<sup>a,b</sup> Jiahe Su,<sup>a,b</sup> Zhongbiao Tan,<sup>a</sup>  
Xuewen He,<sup>c</sup> Min Sun,<sup>d</sup> Xiangqian Li,<sup>a,b</sup> and Shuai He<sup>a,b\*</sup>

<sup>a</sup>Faculty of Life Science and Food Engineering, HuaiYin Institute of Technology, Huaian 223003, P. R. China

<sup>b</sup>Jiangsu Provincial Key Construction Laboratory of Probiotics Preparation, Huaiyin Institute of Technology, Huaian 223003, P. R. China

<sup>c</sup>The Key Lab of Health Chemistry and Molecular Diagnosis of Suzhou, College of Chemistry, Chemical Engineering and Materials Science Soochow University, 215123, Suzhou, P.R. China

<sup>d</sup>Huai'an Municipal Center for Disease Control and Prevention, Huaian, China

\*Author for correspondence ([heshuaiouc@163.com](mailto:heshuaiouc@163.com))

## 1. Additional Figures

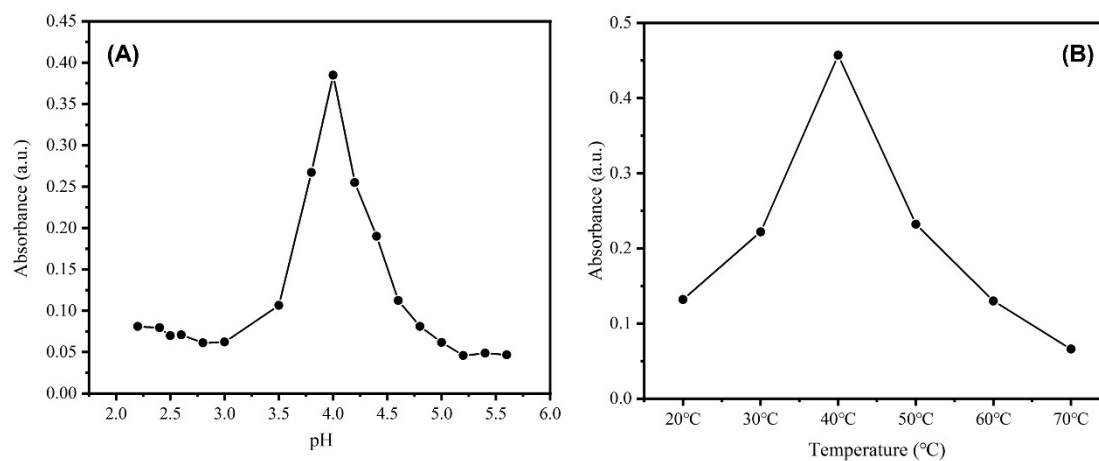

Figure S1. (A) pH-dependent, (B) temperature-dependent POD-like activity of WHE-ZnO NEs.

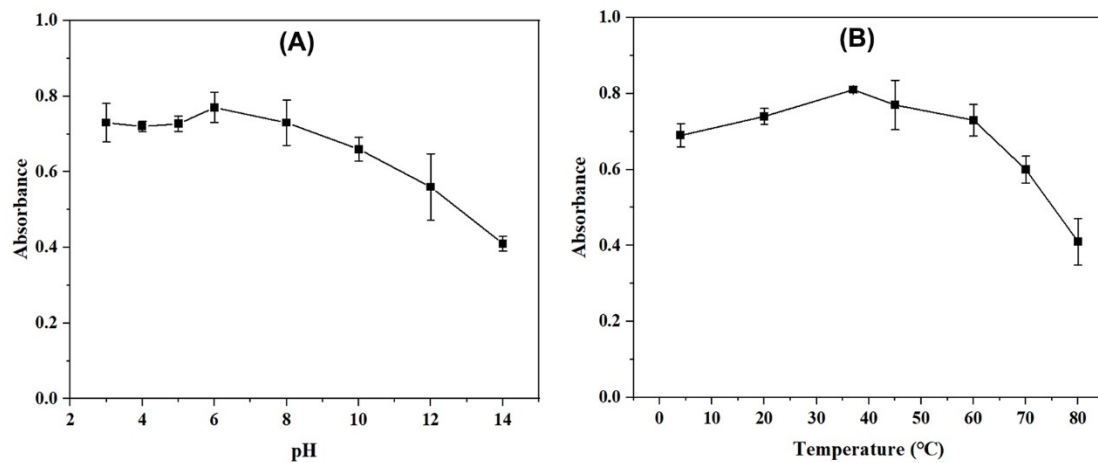

Figure S2. Stability of WHE-ZnO NEs after incubating at various temperature (A) and pH values (B) for 24 h.

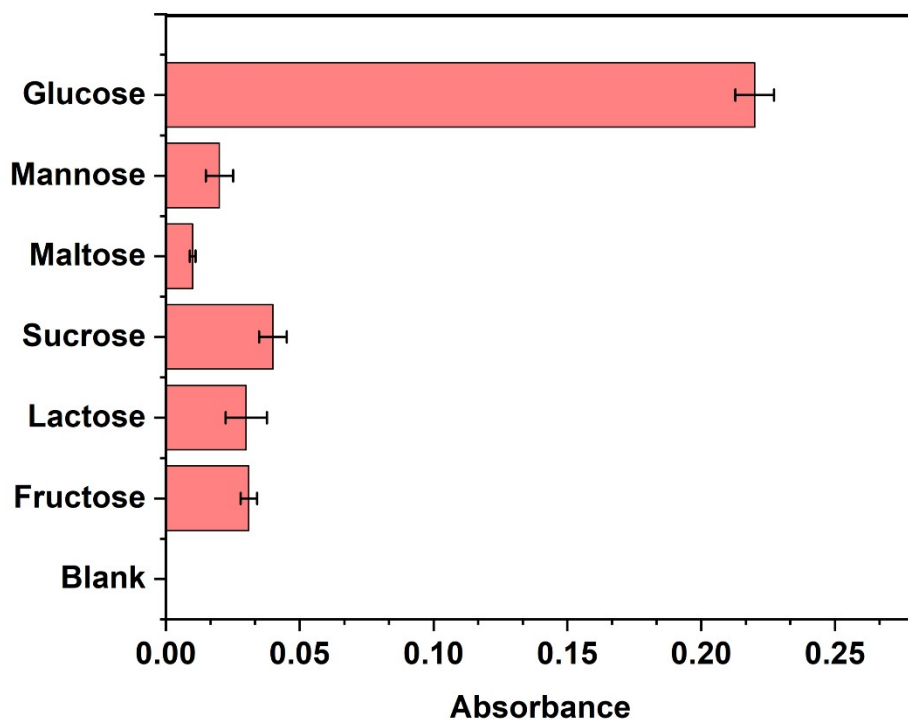

Figure S3. Selectivity evaluation of the glucose detection method.

## 2. Additional Tables

Table S1. Analysis of active ingredients in hops extract

| No. | RT (min) | Compound                                                                                                               | Molecular formula                                                            | Relative content (%) |
|-----|----------|------------------------------------------------------------------------------------------------------------------------|------------------------------------------------------------------------------|----------------------|
| 1   | 5.42     | Ribitol, 1,3:2,4-di-O-benzylidene                                                                                      | C <sub>19</sub> H <sub>20</sub> O <sub>5</sub>                               | 0.13                 |
| 2   | 6.10     | 1,5-Heptadiene, 3,3,6-trimethyl                                                                                        | C <sub>10</sub> H <sub>18</sub>                                              | 4.04                 |
| 3   | 20.03    | Phthalic acid, but-3-yn-2-yl cyclohexylmethyl ester                                                                    | C <sub>19</sub> H <sub>22</sub> O <sub>4</sub>                               | 0.42                 |
| 4   | 20.89    | Ethanone, 1-(7-hydroxy-5-methoxy-2,2-dimethyl-2H-1-benzopyran-8-yl)                                                    | C <sub>14</sub> H <sub>16</sub> O <sub>4</sub>                               | 1.79                 |
| 5   | 22.69    | O-Vanadic acid, tris(4-pentenyl) ester                                                                                 | C <sub>15</sub> H <sub>27</sub> O <sub>4</sub> V                             | 0.19                 |
| 6   | 22.78    | Androstan-17-ol                                                                                                        | C <sub>19</sub> H <sub>32</sub> O                                            | 0.13                 |
| 7   | 23.12    | Pregnane-3,11,20-trione, (5.beta.)                                                                                     | C <sub>21</sub> H <sub>30</sub> O <sub>3</sub>                               | 0.34                 |
| 8   | 23.22    | 2,6,9-Undecatriene                                                                                                     | C <sub>11</sub> H <sub>18</sub> O <sub>3</sub>                               | 0.39                 |
| 9   | 23.31    | 2-Pyrimidinamine, 5-bromo-4-methoxy-6-methyl                                                                           | C <sub>6</sub> H <sub>8</sub> BrN <sub>3</sub> O                             | 0.54                 |
| 10  | 23.43    | Epiandrosterone                                                                                                        | C <sub>19</sub> H <sub>30</sub> O <sub>2</sub>                               | 0.27                 |
| 11  | 23.54    | Benzene, hexa(1-propenyl)                                                                                              | C <sub>24</sub> H <sub>30</sub>                                              | 1.42                 |
| 12  | 23.68    | Acridin-9-yl-(5-methyl-[1,3,4]thiadiazol-2-yl)-amine                                                                   | C <sub>16</sub> H <sub>12</sub> N <sub>4</sub> S                             | 0.32                 |
| 13  | 23.74    | Propanenitrile, 3-[1-[3-(1-pyrrolidinyl)propynyl]-1-cyclohexyloxy]                                                     | C <sub>16</sub> H <sub>24</sub> N <sub>2</sub> O                             | 0.3                  |
| 14  | 23.86    | Lupulon                                                                                                                | C <sub>26</sub> H <sub>38</sub> O <sub>4</sub>                               | 47.98                |
| 15  | 24.03    | (7-tert-Butyl-2-cyclopropyl-5,6,7,8-tetrahydrobenzo[4,5]thieno[2,3-d]pyrimidin-4-ylsulfanyl)acetic acid                | C <sub>19</sub> H <sub>24</sub> N <sub>2</sub> O <sub>2</sub> S <sub>2</sub> | 1.2                  |
| 16  | 48.55    | Phenol, 2,4-bis(1-phenylethyl)                                                                                         | C <sub>22</sub> H <sub>22</sub> O                                            | 9.5                  |
| 17  | 24.41    | Imidazo[1,5-a]pyrrolo[2,1-c][1,4]benzodiazepine-1-carboxylic acid, 7-chloro-9-oxo-11,12,13,13a-tetrahydro, ethyl ester | C <sub>17</sub> H <sub>16</sub> ClN <sub>3</sub> O <sub>3</sub>              | 1.37                 |
| 18  | 24.46    | Benz[a]anthracene-7,12-diol, 7,12-dihydro-7,12-dimethyl-, cis                                                          | C <sub>20</sub> H <sub>18</sub> O <sub>2</sub>                               | 0.63                 |
| 19  | 24.49    | Dronabinol                                                                                                             | C <sub>21</sub> H <sub>30</sub> O <sub>2</sub>                               | 0.66                 |
| 20  | 24.87    | 26,27-Dinoreergosta-5,22-dien-3-ol, (3.beta.,22E)                                                                      | C <sub>26</sub> H <sub>42</sub> O                                            | 1.95                 |
| 21  | 25.00    | Phenol, 2,4-bis(1-methyl-1-phenylethyl)                                                                                | C <sub>24</sub> H <sub>26</sub> O                                            | 2.93                 |
| 22  | 25.05    | 3-(1-Acetoxyethyl)-3-phenylpiperidin-2,6-dione                                                                         | C <sub>15</sub> H <sub>17</sub> NO <sub>4</sub>                              | 1.92                 |
| 23  | 25.16    | Cholest-20(22)-ene-3,6-dione, (5.alpha.)                                                                               | C <sub>27</sub> H <sub>42</sub> O <sub>2</sub>                               | 1.81                 |
| 24  | 25.20    | Tetralin-1-methylamine, N-cyclohexyl-N-oxide                                                                           | C <sub>17</sub> H <sub>23</sub> NO                                           | 0.7                  |
| 25  | 25.39    | 1H-Pyrano[3',4':6,7]indolizino[1,2-b]quinoline-3,14(4H,12H)-dione, 4-ethyl-4-hydroxy-, (S)                             | C <sub>20</sub> H <sub>16</sub> N <sub>2</sub> O <sub>4</sub>                | 1.82                 |
| 26  | 25.45    | Ergosta-7,22-dien-3-ol, (3.beta.,5.alpha.,22Z)                                                                         | C <sub>28</sub> H <sub>46</sub> O                                            | 1.33                 |
| 27  | 25.50    | Isoindole-1,3(2H)-dione, 5,6-dichloro-2-phenyl                                                                         | C <sub>14</sub> H <sub>7</sub> Cl <sub>2</sub> NO <sub>2</sub>               | 1.11                 |
| 28  | 25.60    | Androstane-17-carboxylic acid, 3-(acetyloxy)-14-hydroxy-, methyl ester, (3.beta.,5.beta.,14.beta.,17.beta.)            | C <sub>23</sub> H <sub>36</sub> O <sub>5</sub>                               | 1.11                 |
| 29  | 25.70    | D:A-Friedooleanane                                                                                                     | C <sub>30</sub> H <sub>52</sub>                                              | 1.91                 |
| 30  | 25.86    | Retinoic acid, 5,6-epoxy-5,6-dihydro-, methyl ester                                                                    | C <sub>21</sub> H <sub>30</sub> O <sub>3</sub>                               | 0.55                 |
| 31  | 25.92    | 5.alpha.-Androstane, 3.alpha., 11.alpha., 17.beta.-trihydroxy                                                          | C <sub>19</sub> H <sub>32</sub> O <sub>3</sub>                               | 0.89                 |
| 32  | 26.01    | Cholesta-8,14-dien-3-ol, 4,4-dimethyl-, (3.beta.,5.alpha.)                                                             | C <sub>29</sub> H <sub>48</sub> O                                            | 2.17                 |
| 33  | 26.10    | Oxalic acid, momoamide, N-(2-chlorophenyl)-, butyl ester                                                               | C <sub>12</sub> H <sub>14</sub> ClNO <sub>3</sub>                            | 0.49                 |
| 34  | 26.14    | N-(2-Amino-4-chlorophenyl)anthranilic acid                                                                             | C <sub>13</sub> H <sub>11</sub> ClN <sub>2</sub> O <sub>2</sub>              | 0.37                 |
| 35  | 26.21    | 4H-Pyrido[4,3-b]indole-4,4-dicarboxylic acid, 1,2,3,5-tetrahydro-2-methyl-, diethyl ester                              | C <sub>18</sub> H <sub>22</sub> N <sub>2</sub> O <sub>4</sub>                | 1.38                 |
| 36  | 26.39    | Disilane, 1,1,1,2,2-pentamethyl-2-[(cyclopropyl)(phenylthio)methyl]                                                    | C <sub>15</sub> H <sub>26</sub> SSi <sub>2</sub>                             | 0.58                 |

|    |       |                                                                                                                  |                                                                            |      |
|----|-------|------------------------------------------------------------------------------------------------------------------|----------------------------------------------------------------------------|------|
| 37 | 26.53 | 4-(4-Methoxy-6-methyl-5,6,7,8-tetrahydro-[1,3]dioxolo[4,5-g]isoquinolin-5-yl)-5-propyl-2,4-dihydro-pyrazol-3-one | C <sub>18</sub> H <sub>23</sub> N <sub>3</sub> O <sub>4</sub>              | 0.46 |
| 38 | 26.68 | 13-Docosenamide, (Z)                                                                                             | C <sub>22</sub> H <sub>43</sub> NO                                         | 2.35 |
| 39 | 26.86 | 1-(1,1,2,3,3,3-Hexafluoropropyl)-4,5-bis(methoxycarbonyl)-1,2,3-triazole                                         | C <sub>9</sub> H <sub>7</sub> F <sub>6</sub> N <sub>3</sub> O <sub>4</sub> | 0.7  |
| 40 | 26.91 | 3-Morpholino-thioacrylomorpholide                                                                                | C <sub>11</sub> H <sub>18</sub> N <sub>2</sub> O <sub>2</sub> S            | 0.17 |
| 41 | 27.02 | 2-(4,7-Dimethyl-quinazolin-2-ylamino)-6-methyl-pyrimidin-4-ol                                                    | C <sub>15</sub> H <sub>15</sub> N <sub>5</sub> O                           | 0.21 |
| 42 | 27.23 | Estra-1,3,5(10)-trien-17-one, 3,7-dihydroxy-, O-methyloxime, (7.alpha.)                                          | C <sub>19</sub> H <sub>25</sub> NO <sub>3</sub>                            | 0.15 |
| 43 | 27.35 | Androstane, (5.beta.,14.beta.)                                                                                   | C <sub>19</sub> H <sub>32</sub>                                            | 0.27 |
| 44 | 28.19 | Benzeneacetic acid, 3-methoxy-4-[(trimethylsilyl)oxy]-, ethyl ester                                              | C <sub>14</sub> H <sub>22</sub> O <sub>4</sub> Si                          | 0.25 |
| 45 | 28.85 | Cyclodeca[b]furan-2(3H)-one, 9-(acetyloxy)-3a,4,5,8,9,11a-hexahydro-4-hydroxy-6,10-dimethyl-3-methylene          | C <sub>17</sub> H <sub>22</sub> O <sub>5</sub>                             | 0.17 |
| 46 | 29.37 | 5,5',8,8'-Tetrahydroxy-3,3'-dimethyl-2,2'-binaphthalene-1,1',4,4'-tetrone                                        | C <sub>22</sub> H <sub>14</sub> O <sub>8</sub>                             | 0.29 |
| 47 | 29.60 | Benzenamine, 4,4',4''-phosphinyldynetris[N,N-dimethyl                                                            | C <sub>24</sub> H <sub>30</sub> N <sub>3</sub> OP                          | 0.19 |
| 48 | 29.69 | Quinoline, 2-chloro-6-methoxy-4-methyl                                                                           | C <sub>11</sub> H <sub>10</sub> ClNO                                       | 0.15 |

Table S2. Analytical results of serum samples by the proposed method.

| Sample   | Without spiking (mM) | Glucose spiked (mM) | Glucose measured (mM) | Recovery (%) |
|----------|----------------------|---------------------|-----------------------|--------------|
| Serum -1 | 3.28 ± 0.27          | 10                  | 12.82 ± 0.79          | 95.40        |
| Serum -2 | 3.06 ± 0.55          | 20                  | 23.91 ± 1.12          | 104.25       |
| Serum -3 | 3.58 ± 0.81          | 50                  | 54.89 ± 1.63          | 102.62       |
| Serum -4 | 3.28 ± 0.44          | 100                 | 107.33 ± 1.54         | 104.13       |
